# Supplementary material for: SIRPαFc treatment targets human acute myeloid leukemia stem cells
Source: PubMed Central journal article supplement — Haematologica. 2020 Feb 13;106(1):279–83. doi: 10.3324/haematol.2019.245167 (PMC7776262; doi:10.3324/haematol.2019.245167), 2020-02-13
Supplement: 2019_245167_GALKIN_SUPPL.pdf [file 2019_245167_GALKIN_SUPPL.pdf]

**SIRP $\alpha$ Fc treatment targets human acute myeloid leukemia stem cells**

---

Oleksandr Gallein,<sup>1</sup> Jessica McLeod,<sup>1</sup> James A. Kennedy,<sup>1,2\*</sup> Liqing Jin,<sup>1</sup> Nathan Mbong,<sup>1</sup> Mark Wong,<sup>3</sup> Robert A. Uger,<sup>3</sup> Mark D. Minden,<sup>1,2,4,5</sup> Jayne S. Danska<sup>5,6,7</sup> and Jean C.Y. Wang<sup>1,2,4</sup>

<sup>1</sup>Princess Margaret Cancer Center, University Health Network; <sup>2</sup>Division of Medical Oncology and Hematology, Department of Medicine, University Health Network; <sup>3</sup>Trillium Therapeutics Inc., Mississauga; <sup>4</sup>Department of Medicine, University of Toronto; <sup>5</sup>Department of Medical Biophysics, University of Toronto; <sup>6</sup>Hospital for Sick Children, Toronto and <sup>7</sup>Department of Immunology, University of Toronto, Toronto, Ontario, Canada

\*Current affiliation: Odette Cancer Center, Sunnybrook Health Sciences Center, Toronto

Correspondence: JEAN C.Y. WANG - jean.wang@uhnresearch.ca

doi:10.3324/haematol.2019.245167

## **MATERIALS AND METHODS**

### **AML patient samples**

Peripheral blood was collected from AML patients at the Princess Margaret Cancer Centre after obtaining informed consent according to procedures approved by the Research Ethics Board of the University Health Network (UHN). Mononuclear cells were isolated by Ficoll density gradient separation and viably frozen in FCS with 10% DMSO. Patient samples were pre-screened for engraftment ability in NSG mice; only well engrafting ones were used for the study. LSC17 scores were measured on RNA extracted from bulk AML samples following a protocol modified from our previous study [1]. Samples were prepared and analyzed using an nCounter Analysis System Prep Station and Digital Analyzer (NanoString Technologies). Raw transcript counts were analyzed using nSolver analysis software (version 3.0.22) for quality control and normalization. The LSC17 score calculated for each patient was compared to the median of a reference AML cohort to determine if the patient had a high or low score. A manuscript is in preparation describing the assay methodology in detail.

### **Effects of SIRP $\alpha$ Fc treatment in primary AML xenografts**

Animal experiments were performed in accordance with institutional guidelines approved by the UHN Animal Care Committee. Transplantation of human cells into recipient mice was performed as previously described [2, 3]. NOD/Lt-*scid*/*IL2R $\gamma$* <sup>null</sup> (NSG) mice were sublethally irradiated with 225 cGy 24 hours before transplantation. Patient samples were depleted of T cells using the EasySep Human CD3 Positive Selection Kit (STEMCELL Technologies, Vancouver, Canada). AML samples were transplanted by intrafemoral (IF) injection at a dose of 1 to 5 $\times$ 10<sup>6</sup> cells per mouse. Starting 2 weeks post-transplantation, mice were treated with 5 mg/kg human

SIRP $\alpha$ Fc (TTI-621, Trillium Therapeutics Inc., Mississauga, Canada) or 10 mg/kg control IgG 3 $\times$ /week for 4 weeks. After 4 weeks of treatment, the mice were sacrificed and leukemic engraftment in the injected right femur (RF) and non-injected femur and tibiae (BM) was evaluated by flow cytometry using human-specific monoclonal antibodies (mAbs). Cells reserved from RF and BM from treatment cohorts were pooled separately and frozen viably for secondary transplantation.

### **Flow cytometric analysis of AML engraftment**

Leukemic engraftment was determined by the percentage of human CD45<sup>+</sup>/CD33<sup>+</sup> cells in the murine bone marrow. The following human-specific mAbs were used for staining: anti-CD47-FITC clone B6H12, anti-CD45-APC, anti-CD38-PE-Cy7 (BD Biosciences), anti-CD47-FITC clone 2D3 (eBioscience, San Diego, CA, USA), anti-CD33-PE-Cy5 (Beckman Coulter, Brea, CA), anti-CD34-APC-Cy7 (Biolegend, San Diego, CA, USA). Data were acquired on a BD LSRII flow cytometer (BD Biosciences) and analyzed using FlowJo software v9.9.6 for Mac OS (Tree Star, Ashland, OR, USA).

### **Definition of response to SIRP $\alpha$ Fc treatment**

The definition of response was based on the relative reduction (RR) of leukemic engraftment in SIRP $\alpha$ Fc-treated versus control-treated mice [4]. RR was calculated as  $[(\text{mean\%engraftment of control-treated mice}) - (\text{mean\%engraftment of SIRP}\alpha\text{Fc-treated mice})] / (\text{mean\%engraftment of control-treated mice})$ . Patient samples were classified as responders (R) if RR in the injected RF was >50%, partial responders (PR) if we observed 20 to 50% RR in the RF or >20% in the BM only, and non-responders (NR) if there was no statistically significant

difference in engraftment levels between control- and SIRP $\alpha$ Fc-treated mice, or RR was <20% in both RF and BM.

### **Secondary transplantation assays**

NSG mice were sublethally irradiated (225 cGy) 24 hours before transplantation. Bone marrow cells were harvested and pooled from cohorts of primary engrafted mice and depleted of contaminating mouse cells using Mouse Cell Depletion Kit (Miltenyi Biotech, Auburn, CA, USA). Human AML cells were injected IF at varying doses into cohorts of mice for limiting dilution analysis of LSC frequency. After 12 weeks, mice were sacrificed and the level of leukemic engraftment was evaluated by flow cytometry. Mice were scored as positive if there was a definite CD45<sup>+</sup>CD33<sup>+</sup> human graft of greater than 0.1%. The LSC frequency and 95% confidence intervals were calculated using L-Calc software (STEMCELL Technologies, <https://www.stemcell.com/l-calc-software.html>).

### **Statistical analysis**

Thirty independent patient samples were used in the study to capture the diversity of AML. Comparison of engraftment between drug- and control-treated mice was performed using two-tailed *t* tests (NS,  $p > 0.05$ ; \* $p \leq 0.05$ ; \*\* $p \leq 0.01$ ; \*\*\* $p \leq 0.001$ ; \*\*\*\* $p \leq 0.0001$ ). Data were analyzed using Prism v.6 for Mac OS X (GraphPad Software, San Diego, USA).

### **References**

1. Ng SW, Mitchell A, Kennedy JA, et al. A 17-gene stemness score for rapid determination of risk in acute leukaemia. *Nature*. 2016;540(7633):433-437.
2. Jin L, Hope KJ, Zhai Q, et al. Targeting of CD44 eradicates human acute myeloid leukemic stem cells. *Nat Med*. 2006;12(10):1167-1174.

3. Jin L, Lee EM, Ramshaw HS, et al. Monoclonal antibody-mediated targeting of CD123, IL-3 receptor alpha chain, eliminates human acute myeloid leukemic stem cells. *Cell Stem Cell*. 2009;5(1):31-42.
4. Chen WC, Yuan JS, Xing Y, et al. An integrated analysis of heterogeneous drug responses in acute myeloid leukemia that enables the discovery of predictive biomarkers. *Cancer Research*. 2016;76(5):1214-1225.

**Supplementary Table 1. Clinical characteristics of AML samples at diagnosis.**

| Patient ID | Age | Sex | AML type       | Sample type        | Cytogenetics        |                    | Blood Parameters              |               | Mutational Profiling |                  | LSC17 score |
|------------|-----|-----|----------------|--------------------|---------------------|--------------------|-------------------------------|---------------|----------------------|------------------|-------------|
|            |     |     |                |                    | Normal vs. Abnormal | MRC Classification | WBC count ( $\times 10^9/L$ ) | BM blasts (%) | <i>NPM1c</i>         | <i>FLT3</i> -ITD |             |
| AML3       | 84  | M   | <i>de novo</i> | Diagnosis          | Normal              | Intermediate       | 227                           | 95            | ND                   | negative         | 0.11        |
| AML4       | 75  | F   | <i>de novo</i> | Diagnosis          | Normal              | Intermediate       | 227                           | 80            | ND                   | ND               | 1.12        |
| AML5       | 53  | F   | <i>de novo</i> | Diagnosis          | Normal              | Intermediate       | 218                           | 57            | positive             | positive         | 0.72        |
| AML6       | 75  | F   | t-AML          | Diagnosis          | ND                  | ND                 | 29                            | ND            | ND                   | ND               | 0.27        |
| AML7       | 26  | F   | <i>de novo</i> | Diagnosis          | Normal              | Intermediate       | 114                           | 40            | negative             | positive         | 0.78        |
| AML8       | 58  | M   | <i>de novo</i> | Diagnosis          | Normal              | Intermediate       | 102                           | 70            | positive             | positive         | 0.90        |
| AML9       | 72  | M   | s-AML          | Diagnosis          | Normal              | Intermediate       | 43                            | ND            | ND                   | ND               | 0.59        |
| AML10      | 86  | M   | <i>de novo</i> | Diagnosis          | ND                  | ND                 | 218                           | ND            | ND                   | ND               | 0.12        |
| AML11      | 71  | F   | <i>de novo</i> | Relapse/Refractory | Abnormal            | Intermediate       | 7                             | 52            | negative             | positive         | 0.97        |
| AML12      | 52  | M   | <i>de novo</i> | Diagnosis          | Normal              | Intermediate       | 163                           | 90            | positive             | positive         | 0.87        |
| AML13      | 79  | F   | <i>de novo</i> | Diagnosis          | Abnormal            | Adverse            | 75                            | 50            | ND                   | ND               | 0.84        |
| AML14      | 62  | M   | <i>de novo</i> | Diagnosis          | Normal              | Intermediate       | 155                           | 63            | negative             | negative         | 0.71        |
| AML15      | 50  | F   | <i>de novo</i> | Diagnosis          | Abnormal            | Adverse            | 132                           | 80            | negative             | negative         | 1.27        |
| AML16      | 56  | F   | <i>de novo</i> | Relapse/Refractory | Normal              | Intermediate       | 16                            | 40            | positive             | positive         | 0.95        |
| AML17      | 69  | F   | s-AML          | Relapse/Refractory | Abnormal            | Adverse            | 24                            | 30            | ND                   | ND               | 0.78        |
| AML18      | 67  | F   | <i>de novo</i> | Diagnosis          | Normal              | Intermediate       | 100                           | 94            | positive             | positive         | 0.94        |
| AML19      | 74  | F   | <i>de novo</i> | Diagnosis          | Normal              | Intermediate       | 16                            | 30            | positive             | positive         | 1.17        |
| AML20      | 55  | M   | s-AML          | Diagnosis          | Abnormal            | Adverse            | 29                            | 62            | ND                   | ND               | 1.33        |
| AML21      | 54  | F   | <i>de novo</i> | Diagnosis          | Normal              | Intermediate       | 74                            | 80            | negative             | positive         | 0.78        |
| AML22      | 54  | M   | <i>de novo</i> | Relapse/Refractory | Abnormal            | Adverse            | 47                            | 80            | ND                   | ND               | 1.22        |
| AML23      | 55  | M   | t-AML          | Diagnosis          | Abnormal            | Adverse            | 99                            | 60            | ND                   | ND               | 0.68        |
| AML24      | 75  | M   | s-AML          | Relapse/Refractory | Normal              | Intermediate       | 4                             | 23            | ND                   | ND               | 1.09        |
| AML25      | 55  | M   | s-AML          | Relapse/Refractory | Normal              | Intermediate       | 114                           | ND            | negative             | positive         | 0.81        |
| AML26      | 33  | M   | <i>de novo</i> | Diagnosis          | Normal              | Intermediate       | 151                           | 90            | positive             | positive         | 0.87        |
| AML27      | 55  | F   | t-AML          | Diagnosis          | Abnormal            | Intermediate       | 235                           | 70            | ND                   | ND               | 0.80        |
| AML28      | 67  | F   | <i>de novo</i> | Diagnosis          | Normal              | Intermediate       | 40                            | 92            | negative             | negative         | 0.54        |
| AML29      | 69  | M   | t-AML          | Diagnosis          | Abnormal            | Adverse            | 24                            | 80            | ND                   | ND               | 0.53        |
| AML30      | 37  | M   | s-AML          | Relapse/Refractory | Abnormal            | Adverse            | 5                             | 51            | ND                   | ND               | 1.18        |
| AML31      | 59  | F   | <i>de novo</i> | Diagnosis          | Normal              | Intermediate       | 43                            | 90            | positive             | negative         | 0.17        |
| AML32      | 48  | F   | <i>de novo</i> | Relapse/Refractory | Normal              | Intermediate       | 107                           | 85            | positive             | positive         | 0.60        |

t-AML, therapy-related AML; s-AML, secondary AML (post MDS/MPN); ND, not done. Median cutoff for high vs low LSC17 score is 0.51

**Supplementary Table 2. SIRP $\alpha$ Fc treatment reduces LSC frequency determined by secondary limiting dilution assays**

| Sample | Primary mice            |             |                  | Secondary mice |                  |                 | LSC frequency (1/n) |                     | Fold change | P value |
|--------|-------------------------|-------------|------------------|----------------|------------------|-----------------|---------------------|---------------------|-------------|---------|
|        | <i>In vivo</i> response | Cell source | Condition        | Cell dose      | n mice engrafted | n mice injected | Estimate            | 95% CI              |             |         |
|        |                         |             |                  |                |                  |                 |                     |                     |             |         |
| AML28  | PR                      | RF          | Control          | 1,000,000      | 6                | 7               | 353,479             | 158,428 – 788,670   | ↓ 5.4       | 0.003   |
|        |                         |             |                  | 100,000        | 4                | 10              |                     |                     |             |         |
|        |                         |             | SIRP $\alpha$ Fc | 1,000,000      | 3                | 10              | 1,893,540           | 761,240 – 4,710,240 |             |         |
|        |                         |             |                  | 100,000        | 2                | 12              |                     |                     |             |         |
| AML30  | PR                      | BM          | Control          | 50,000         | 2                | 2               | 710                 | 276 – 1,824         | ↓ 3.9       | 0.024   |
|        |                         |             |                  | 5,000          | 10               | 10              |                     |                     |             |         |
|        |                         |             |                  | 500            | 4                | 8               |                     |                     |             |         |
|        |                         |             | SIRP $\alpha$ Fc | 50,000         | 2                | 2               | 2,791               | 1,379 – 5,648       |             |         |
|        |                         |             |                  | 5,000          | 9                | 10              |                     |                     |             |         |
|        |                         |             |                  | 500            | 0                | 8               |                     |                     |             |         |
| AML31  | PR                      | RF          | Control          | 100,000        | 7                | 10              | 111,175             | 53,072 – 232,888    | ↓ 10.3      | 0.006   |
|        |                         |             |                  | 20,000         | 0                | 9               |                     |                     |             |         |
|        |                         |             | SIRP $\alpha$ Fc | 100,000        | 1                | 10              | 1,149,275           | 162,728 – 8,166,808 |             |         |
|        |                         |             |                  | 20,000         | 0                | 10              |                     |                     |             |         |
| AML32  | NR                      | BM          | Control          | 250,000        | 2                | 2               | 12,540              | 6,321 – 24,877      | ↓ 5.3       | 0.002   |
|        |                         |             |                  | 50,000         | 10               | 10              |                     |                     |             |         |
|        |                         |             |                  | 20,000         | 6                | 8               |                     |                     |             |         |
|        |                         |             | SIRP $\alpha$ Fc | 250,000        | 2                | 2               | 66,965              | 33,128 – 135,363    |             |         |
|        |                         |             |                  | 50,000         | 6                | 10              |                     |                     |             |         |
|        |                         |             |                  | 20,000         | 1                | 8               |                     |                     |             |         |

PR, partial responder; NR, non-responder; RF, injected right femur; BM, non-injected bone marrow.
